# 1 Iroki: automatic customization for phylogenetic trees

2

3 Ryan M. Moore<sup>1\*</sup>, Amelia O. Harrison<sup>2</sup>, Sean M. McAllister<sup>2</sup>, Rachel L. Marine<sup>3</sup>, Clara

4 Chan<sup>2</sup>, and K. Eric Wommack<sup>1</sup>

5

6 <sup>1</sup>Center for Bioinformatics & Computational Biology, University of Delaware, Newark, DE,

7 USA

8 <sup>2</sup>School of Marine Science and Policy, University of Delaware, Newark, DE, USA

9 <sup>3</sup>Department of Biological Sciences, University of Delaware, Newark, DE, USA

10

11 Corresponding author's information

12 \*To whom correspondence should be addressed

13 **Address: Delaware Biotechnology Institute, 15 Innovation Way, Newark, Delaware**

14 **19711**

15 **(Tel): (302) 831-4362**

16 **(Fax): (302) 831-3447**

17 **(E-mail): [moorer@udel.edu](mailto:moorer@udel.edu)**

18

19 **Abstract**

20 *Background*

21 Phylogenetic trees are an important analytical tool for examining species and community

22 diversity, and the evolutionary history of species. In the case of microorganisms,

23 decreasing sequencing costs have enabled researchers to generate ever-larger sequence  
24 datasets, which in turn have begun to fill gaps in the evolutionary history of microbial  
25 groups. However, phylogenetic analyses of large sequence datasets present challenges to  
26 extracting meaningful trends from complex trees. Scientific inferences made by visual  
27 inspection of phylogenetic trees can be simplified and enhanced by customizing various  
28 parts of the tree, including label color, branch color, and other features. Yet, manual  
29 customization is time-consuming and error prone, and programs designed to assist in  
30 batch tree customization often require programming experience. To address these  
31 limitations, we developed Iroki, a program for fast, automatic customization of  
32 phylogenetic trees. Iroki allows the user to incorporate information on a broad range of  
33 metadata for each experimental unit represented in the tree.

34

### 35 *Results*

36 Iroki was applied to four existing microbial sequence datasets to demonstrate its utility in  
37 data exploration and presentation. Iroki was used to highlight connections between viral  
38 phylogeny and host taxonomy, to explore the abundance of microbial groups across  
39 samples of cattle hide, to examine short-term temporal dynamics of viroplankton  
40 communities, and to search for trends in the biogeography of Zetaproteobacteria.

41

### 42 *Conclusions*

43 Iroki is an easy-to-use web app and command line application for fast, automatic  
44 customization of phylogenetic trees based on user-provided categorical or continuous

45 metadata. Iroki allows for rapid hypothesis testing through visualizing custom  
46 phylogenetic trees, streamlining the process of phylogenetic data exploration and  
47 presentation.

48

#### 49 Availability

50 Iroki can be accessed through a web app or via installation through RubyGems, from  
51 source, or through the Iroki Docker image. All source code and documentation is  
52 available under the GPLv3 license at <https://github.com/mooreryan/iroki>. The Iroki web-  
53 app is accessible at [www.iroki.net](http://www.iroki.net) or through the Virome portal  
54 (<http://virome.dbi.udel.edu>), and its source code is released under GPLv3 license at  
55 [https://github.com/mooreryan/iroki\\_web](https://github.com/mooreryan/iroki_web). The Docker image can be found here:  
56 <https://hub.docker.com/r/mooreryan/iroki>.

57

#### 58 **Keywords**

59 Phylogeny, visualization, sequence analysis, bioinformatics, metagenomics

60

## 61 **Iroki: automatic customization for phylogenetic trees**

62

### 63 **Background**

64 Studies in microbial ecology often use phylogenetic trees as a means for assessing the  
65 diversity and evolutionary history of microorganisms. As the cost of sequencing has  
66 declined, researchers have been able to gather ever-larger sequence datasets. While large  
67 sequence datasets have begun to fill in the gaps in the evolutionary history of microbial  
68 groups [1–5]; they have also posed new analytical challenges as extracting meaningful  
69 trends within such highly dimensional datasets can be cumbersome. In particular,  
70 scientific inferences made by visual inspection of phylogenetic trees can be simplified and  
71 enhanced by customizing various parts of the tree including label and branch color,  
72 branch width, and other features. Though many tree visualization packages allow for  
73 manual modifications [6–9], the process can be time consuming and error prone  
74 especially when the tree contains many nodes. While a handful of existing programs  
75 address the issue of tree visualization, most are not capable of batch customization and  
76 those that do often require programming experience [10–13].

77

78 Iroki, a program for fast, automatic customization of phylogenetic trees, was developed to  
79 address these limitations and enable users to incorporate information on a broad range of  
80 metadata for each experimental unit represented in the tree. Iroki is available for use  
81 through a web interface at [www.iroki.net](http://www.iroki.net), through the Virome portal  
82 (<http://virome.dbi.udel.edu>), and through a UNIX command line tool. Results are saved in

83 the widely used Nexus format with color metadata tailored for use with FigTree [8] (a  
84 freely available and efficient tree viewer).

85

## 86 **Implementation**

87 Iroki enhances visualization of phylogenetic trees by coloring node labels and branches

88 according to categorical metadata criteria or numerical data such as abundance

89 information. Iroki can also rename nodes in a batch process according to user

90 specifications so that node names are more descriptive. A tree file in Newick format

91 containing a phylogenetic tree is always required. Additional required input files depend

92 on the operation(s) desired. Coloring functions require a color map or a biom [14] file.

93 Node renaming functions require a name map. The color map, name map, and biom files

94 are created by the user and, along with the Newick file, form the inputs for Iroki.

95

### 96 *Explicit tree coloring*

97 Iroki's principle functionality involves coloring node labels and/or branches based on

98 information provided by the user in the color map. The color map text file contains either

99 two or three tab-delimited columns depending on how branches and labels are to be

100 colored. Two columns, pattern and color, are used when labels and branches are to have

101 the same color. Three columns, pattern, label color, and branch color, are used when

102 branches and labels are to have different colors. Patterns are searched against node labels

103 either as regular expressions or exact string matches.

104

105 Entries in the color column can be any of the 657 named colors in the R programming  
106 language [15] (e.g., skyblue, tomato, goldenrod2, lightgray, black) or any valid  
107 hexadecimal color code (e.g., #FF78F6). In addition, Iroki provides a 19 color palette  
108 with complementary colors based on Kelly's color scheme for maximum contrast [16].  
109 Nodes in the tree that are not in the color map will remain black.

110  
111 Depending on user-specified options, a pattern match to node label(s) will trigger coloring  
112 of the label and/or the branch directly connected to that label. Inner branches will be  
113 colored to match their descendent branches if all descendants are the same color,  
114 allowing quick identification of common ancestors and clades that share common  
115 metadata.

116  
117 *Tree coloring based on numerical data*

118 Iroki provides the ability to generate color gradients based on numerical data, such as  
119 absolute or relative abundance, from a tab-delimited biom format file. Single-color  
120 gradients use color saturation to illustrate numerical differences, with nodes at a higher  
121 level being more saturated than those at a lower level. For example, highly abundant  
122 nodes will be represented by more highly saturated colors. Two-color gradients show  
123 numerical differences through both color mixing and luminosity. Additionally, the biom  
124 file may specify numerical information for one group (e.g., abundance in a particular  
125 sample) or for two groups (e.g., abundance in the treatment group vs. abundance in the

126 control group). For biom files with one group, single- or two-color gradients may be used.

127 However, biom files specifying two-group metadata may only use the two-color gradient.

128

129 *Renaming nodes*

130 Some packages for generating phylogenetic trees restrict the use of special characters and

131 spaces or require node names to be shorter than a specified length or (RAxML [17],

132 PHYLIP [18], etc.). Name restrictions present challenges to scientific interpretation of

133 phylogenetic trees. Iroki's renaming function uses a two-column, tab-delimited name map

134 to associate current node names, exactly matching those in the tree file, with new names.

135 The new name column has no restrictions on name length or character type. Iroki ensures

136 name uniqueness by appending integers to the ends of names, if necessary.

137

138 *Combining the color map, name map, and biom files*

139 Iroki can be used to make complex combinations of customizations by combining the

140 color map, name map, and biom files. For example, a biom file can be used to apply a

141 color gradient based on numerical data to the labels of a tree, a color map can be used to

142 separately color the branches based on user-specified conditions, and a name map can be

143 used to rename nodes in a single command or web request. Iroki follows a specific order

144 of precedence when applying multiple customizations. First, the color gradient inferred

145 from the biom file is applied. Next, the color map is applied to specified labels or

146 branches, overriding the gradient applied in the previous step if necessary. Finally, the

147 name map is used to map current names to the new names (Fig. 1).

148

149 *Output*

150 Iroki outputs the modified tree in the Nexus format. When building the phylogenetic tree,

151 FigTree uses the Nexus format file and interprets the color metadata output of Iroki.

152

## 153 **Results & Discussion**

154

155 *Global diversity of bacteriophage*

156 Viruses are the most abundant biological entity on Earth, providing an enormous reservoir

157 of genetic diversity, driving evolution of their hosts, influencing composition of microbial

158 communities, and affecting global biogeochemical cycles [19,20]. The current viral

159 taxonomic system is based on a suite of physical characteristics of the virion rather than

160 on genome sequences. The phage proteomic tree, created to provide a genome-based

161 taxonomic system for bacteriophage classification [21], was recently updated to include

162 hundreds of new phage genomes from the Phage SEED reference database [22], as well as

163 long assembled contigs from viral shotgun metagenomes (viromes) collected from the

164 Chesapeake Bay (SERC) [23] and the Mediterranean Sea [24].

165

166 Taxonomy and host information metadata was collected for the viral genome sequences, a

167 color map was created to assign colors based on viral family and host phyla, and Iroki was

168 used to add color metadata to branches and labels of the phage proteomic tree. Since a



169 large number of colors were required on the tree, Iroki's Kelly color palette was used to  
170 provide clear color contrasts. The tree was rendered with FigTree (Fig. 2).

171

172 Adding color to the phage proteomic tree with Iroki shows trends in the data that would  
173 be difficult to discern without color. Uncultured phage contigs from the SERC and  
174 Mediterranean viromes make up a large portion of all phage sequences shown on the tree,  
175 and are widely distributed among known phage. In general, viruses in the same family  
176 claded together, e.g., branch coloring highlights large groups of closely related  
177 Siphoviridae and Myoviridae. This label-coloring scheme also shows that viruses infecting  
178 hosts within same phylum are, in general, phylogenetically similar. For example, viruses  
179 within one of the multiple large groups of Siphoviridae across the tree infect almost  
180 exclusively host species within the same phylum, e.g., Siphoviridae infecting  
181 Actinobacteria clade away from Siphoviridae infecting Firmicutes or Proteobacteria.

182

183 *Bacterial community diversity and prevalence of E. coli in beef cattle*

184 Shiga toxin-producing *Escherichia coli* (STEC) are dangerous human pathogens that  
185 colonize the lower gastrointestinal tracts of cattle and other ruminants. STEC-  
186 contaminated beef and STEC shed in the feces of these animals are major sources of  
187 foodborne illness. To identify possible interactions between STEC populations and the  
188 commensal cattle microbiome, a recent study examined the diversity of the bacterial  
189 community associated with beef cattle hide [25]. Fecal and hide samples were collected  
190 over twelve weeks and SSU rRNA amplicon libraries were constructed and analyzed by

191 Illumina sequencing [26]. The study indicated that the community structure of hide  
192 bacterial communities was altered when the hides were positive for STEC contamination.  
193  
194 Iroki was used to visualize changes in the relative abundance of each cattle hide bacterial  
195 OTU according to the presence or absence of STEC. A Mann-Whitney U test comparing  
196 OTU abundance between STEC positive and STEC negative samples was performed, and  
197 those bacterial OTUs showing a significant change in relative abundance ( $p < 0.5$ ) were  
198 placed on a phylogenetic tree according to the 16S rRNA sequence. Branches of the tree  
199 were colored based on whether there was a significant change in relative abundance with  
200 STEC contamination (red:  $p \leq 0.05$ , blue:  $p > 0.05$ ). Node labels were colored along a  
201 blue-green color gradient representing the abundance ratio of OTUs between samples  
202 with STEC (blue) and without (green). Additionally, label luminosity was determined  
203 based on overall abundance (lighter: less abundant, darker: more abundant) (Fig. 3). Iroki  
204 makes it clear that most OTUs on the tree showed a significant difference in abundance  
205 (branch coloring) between STEC positive and STEC negative samples (node coloring).  
206 Furthermore, we can see that most OTUs are at low abundance with only a few highly  
207 abundant OTUs (label luminosity). The color gradient added by Iroki allows us to see that  
208 the abundant OTUs were evolutionarily distant from one another and thus spread out  
209 across many phylogenetic groups.  
210  
211 Iroki can be used to quickly test hypotheses without investing a large amount of time  
212 annotating trees manually. A UPGMA tree was created based on unweighted UniFrac

213 distance [27] between 356 bacterial community profiles based on SSU rRNA amplicon  
214 sequences from cattle hide and feces samples (Fig. 4). Iroki was used to evaluate  
215 similarities in sample bacterial communities according to the sampling location. Iroki  
216 colored branches based on whether the sample originated from feces (blue) or from hide  
217 (red). The coloring added by Iroki shows a clear partitioning of bacterial communities on  
218 the tree based on their sampling location (hide or feces). However, four fecal samples  
219 claded with hide samples, and two hide samples claded with fecal samples, highlighting  
220 the ability of Iroki to easily identify good candidates for more in-depth examination.  
221 Additionally, Iroki was used to illustrate a correlation between one of the most abundant  
222 bacterial families, Ruminococcaceae, and sampling location. Iroki colored node labels  
223 with a color gradient based on Ruminococcaceae family abundance, utilizing both a  
224 single color gradient (Fig. 4A) and a two color gradient (Fig. 4B). Custom trees were  
225 visualized using FigTree. Iroki's automatic color gradient and ability to label branches  
226 and nodes based on different criteria clearly show that Ruminococcaceae is more  
227 abundant in fecal samples than in hide samples.

228

### 229 *Short-term dynamics of viroplankton*

230 The gene encoding Ribonucleotide reductase (RNR) is common within viral genomes and  
231 thus can be used as a marker gene for studying viral diversity. Moreover, RNR  
232 polymorphism is predictive of some of the biological and ecological features of viral  
233 populations [28]. A mesocosm experiment examined the short-term dynamics of phage  
234 populations using RNR amplicon sequences, specifically, sequences of class II RNRs of

235 bacteriophages infecting cyanobacterial hosts. A phylogenetic tree was created from the  
236 Cyano II RNR amplicon sequences and Iroki was used to color nodes and branches based  
237 on the time point (0 h, 6 h, 12 h) at which each amplicon sequence was observed. The  
238 customized tree was then visualized using FigTree (Fig. 5). Iroki's coloring showed that no  
239 phylogenetic clade was dominated by OTUs observed in any particular time point; rather,  
240 time points were spread relatively evenly across clades. This analysis demonstrates Iroki's  
241 utility for exploring sequence datasets, allowing the researcher to quickly and easily test  
242 hypotheses.

243

#### 244 *Phylogeny of Zetaproteobacteria within a biogeographic context*

245 Biogeographical studies assess the distribution of an organism's biodiversity across space  
246 and time. The extent to which microorganisms exhibit biogeography is an open question  
247 in microbial ecology. The isolated nature of the microbial communities associated with  
248 deep-ocean hydrothermal vents provides an ideal system for studying the biogeography of  
249 microbes. In particular, iron-oxidizing bacteria have been shown to thrive in vent fluids,  
250 sediments, and iron-rich microbial mats associated with the vents. Globally, iron-  
251 oxidizing bacteria make significant contributions to the iron and carbon cycles. A recent  
252 study analyzed multiple SSU rRNA clone libraries to investigate the biogeography of  
253 Zetaproteobacteria, a phyla containing many iron-oxidizing bacterial species, between  
254 three sampling regions of the Pacific Ocean (central Pacific—Loihi seamount, western  
255 Pacific—Southern Mariana Trough, and southern Pacific (Vailulu'u Seamount/Tonga  
256 Arc/East Lau Spreading Center/Kermadec Arc) [29]. Sequences were aligned and a

257 phylogeny was inferred as described in [29]. Iroki was used to examine the relationship  
258 between sampling location and phylotype by adding branch and label color based on  
259 geographic location and renaming original node labels with OTU and location metadata.  
260 The custom tree was visualized using FigTree (Fig. 6). In some cases, OTUs contained  
261 sequences from only one sampling location (e.g., OTUs 12, 15, and 16), whereas other  
262 OTUs are distributed among more than one sampling location (e.g., OTUs 1, 2, and 4).  
263 Often, sequences sampled from the same geographic location are in the same phylotype  
264 despite being members of different OTUs (e.g., OTUs 10 and 19).

265

#### 266 *Availability and requirements*

267 A web-based version of Iroki can be accessed online at [www.iroki.net](http://www.iroki.net) or through the  
268 Virome portal (<http://virome.dbi.udel.edu/>). For users who wish to run Iroki locally, a  
269 command line version of the program is installable via RubyGems, from GitHub  
270 (<https://github.com/mooreryan/iroki>). A Docker image is available for users who desire the  
271 flexibility of the command line tool, but do not want to install Iroki or manage its  
272 dependencies (<https://hub.docker.com/r/mooreryan/iroki>). Docker is a convenient method  
273 for packaging an application with all of its dependencies that is guaranteed to run the  
274 same regardless of the user's environment [30,31]. The README provided with the source  
275 code provides detailed instructions for setting up and running Iroki. Further  
276 documentation and tutorials can be found at the Iroki Wiki  
277 (<https://github.com/mooreryan/iroki/wiki>).

278

279 *License*

280 Iroki and its associated programs are released under the GNU General Public License  
281 version 3 [32].

282

## 283 **Conclusions**

284 Iroki is a command line program and web app for fast, automatic customization of large  
285 phylogenetic trees based on user specified configuration files describing categorical or  
286 continuous metadata information. The output files include Nexus tree files with color  
287 metadata tailored specifically for use with FigTree. Various example datasets from  
288 microbial ecology studies were analyzed to demonstrate Iroki's utility. In each case, Iroki  
289 simplified the processes of data exploration, data presentation, and hypothesis testing.  
290 Iroki provides a simple and convenient way to rapidly customize phylogenetic trees,  
291 especially in cases where the tree in question is too large to annotate manually or in  
292 studies with many trees to annotate.

293

## 294 **List of Abbreviations**

295 OTU: operational taxonomic

296 RNR: Ribonucleotide reductase

297 STEC: Shiga-toxigenic *Escherichia coli*

298

## 299 **Ethics approval and consent to participate**

300 Not applicable

301

302 **Consent for publication**

303 Not applicable

304

305 **Availability of data and materials**

306 Data and code used to generate figures are available on GitHub at

307 [https://github.com/mooreryan/iroki\\_manuscript\\_data](https://github.com/mooreryan/iroki_manuscript_data)

308

309 **Funding**

310 This project was supported by the USDA National Institute of Food and Agriculture award

311 number 2012-68003-30155 and the National Science Foundation Advances in

312 Bioinformatics program (award number DBI\_1356374).

313

314 **Competing Interests**

315 The authors declare that they have no competing interests.

316

317 **Authors' contributions**

318 RMM and SMM conceived the project. RMM wrote the manuscript and implemented

319 Iroki. AOH and RLM processed and analyzed Cyano II amplicons. All authors read,

320 edited, and approved the final manuscript.

321

322 **Acknowledgements**

323 We would like to acknowledge Daniel J. Nasko and Jessica M. Chopyk for their work on  
324 the phage proteomic tree, and Barbra D. Ferrell for editing the manuscript.  
325



## 326 **References**

- 327 1. Lan Y, Rosen G, Hershberg R. Marker genes that are less conserved in their sequences  
328 are useful for predicting genome-wide similarity levels between closely related prokaryotic  
329 strains. *Microbiome*. 2016;4:18.
- 330 2. Larkin A a, Blinebry SK, Howes C, Lin Y, Loftus SE, Schmaus CA, et al. Niche  
331 partitioning and biogeography of high light adapted *Prochlorococcus* across taxonomic  
332 ranks in the North Pacific. *ISME J*. 2016;1–13.
- 333 3. Simister RL, Deines P, Botté ES, Webster NS, Taylor MW. Sponge-specific clusters  
334 revisited: A comprehensive phylogeny of sponge-associated microorganisms. *Environ.*  
335 *Microbiol*. 2012;14:517–24.
- 336 4. Wu Z, Yang L, Ren X, He G, Zhang J, Yang J, et al. Deciphering the bat virome catalog  
337 to better understand the ecological diversity of bat viruses and the bat origin of emerging  
338 infectious diseases. *ISME J*. 2016;10:609–20.
- 339 5. Müller AL, Kjeldsen KU, Rattei T, Pester M, Loy A. Phylogenetic and environmental  
340 diversity of DsrAB-type dissimilatory (bi)sulfite reductases. *ISME J*. 2015;9:1152–65.
- 341 6. University W. Phylogeny Programs.  
342 <http://evolution.genetics.washington.edu/phylip/software.html#Plotting>. Accessed 2016 Jul  
343 21.
- 344 7. Zhang H, Gao S, Lercher MJ, Hu S, Chen WH. EvolView, an online tool for visualizing,  
345 annotating and managing phylogenetic trees. *Nucleic Acids Res*. 2012;40.
- 346 8. Rambaut A. FigTree. <http://tree.bio.ed.ac.uk/software/figtree/>. Accessed 2016 Jul 21.
- 347 9. Zmasek CM. Archaeopteryx.

- 348 <https://sites.google.com/site/cmzmasek/home/software/archaeopteryx>. Accessed 2016 Jul  
349 21.
- 350 10. Paradis E, Claude J, Strimmer K. APE: Analyses of phylogenetics and evolution in R  
351 language. *Bioinformatics*. 2004;20:289–90.
- 352 11. Revell LJ. phytools: An R package for phylogenetic comparative biology (and other  
353 things). *Methods Ecol. Evol.* 2012;3:217–23.
- 354 12. Huerta-Cepas J, Dopazo J, Gabaldón T. ETE: a python Environment for Tree  
355 Exploration. *BMC Bioinformatics*. 2010;11:24.
- 356 13. Chen W-H, Lercher MJ, Ganfornina M, Gutierrez G, Bastiani M, Sanchez D, et al.  
357 ColorTree: a batch customization tool for phylogenetic trees. *BMC Res. Notes. BioMed*  
358 *Central*; 2009;2:155.
- 359 14. McDonald D, Clemente JC, Kuczynski J, Rideout J, Stombaugh J, Wendel D, et al. The  
360 Biological Observation Matrix (BIOM) format or: how I learned to stop worrying and love  
361 the ome-ome. *Gigascience*. 2012;1:7.
- 362 15. Ripley BD. The R project for statistical computing. 2001. p. 1–3.
- 363 16. Kelly KL. Twenty-two colors of maximum contrast. *Color Eng.* 1965. p. 26–7.
- 364 17. Stamatakis A. RAxML version 8: A tool for phylogenetic analysis and post-analysis of  
365 large phylogenies. *Bioinformatics*. 2014;30:1312–3.
- 366 18. Felsenstein J. PHYLIP. <http://evolution.gs.washington.edu/phylip.html>. Accessed 2016  
367 Jul 21.
- 368 19. Suttle CA. Marine viruses — major players in the global ecosystem. *Nat. Rev.*  
369 *Microbiol.* Nature Publishing Group; 2007;5:801–12.

- 370 20. Rohwer F, Thurber RV. Viruses manipulate the marine environment. *Nature*. Nature  
371 Publishing Group; 2009;459:207–12.
- 372 21. Rohwer F, Edwards R. The Phage Proteomic Tree: a genome-based taxonomy for  
373 phage. *J. Bacteriol.* 2002;184:4529–35.
- 374 22. Phage SEED. <http://www.phantome.org/PhageSeed/Phage.cgi>. Accessed 2016 Jul 21.
- 375 23. Wommack KE, Nasko DJ, Chopyk J, Sakowski EG. Counts and sequences,  
376 observations that continue to change our understanding of viruses in nature. *J. Microbiol.*  
377 2015;53:181–92.
- 378 24. Mizuno CM, Rodriguez-Valera F, Kimes NE, Ghai R. Expanding the marine virosphere  
379 using metagenomics. *PLoS Genet. Public Library of Science*; 2013;9:e1003987.
- 380 25. Chopyk J, Moore RM, DiSpirito Z, Stromberg ZR, Lewis GL, Renter DG, et al. Presence  
381 of pathogenic *Escherichia coli* is correlated with bacterial community diversity and  
382 composition on pre-harvest cattle hides. *Microbiome. BioMed Central*; 2016;4:9.
- 383 26. Fadrosch DW, Ma B, Gajer P, Sengamalay N, Ott S, Brotman RM, et al. An improved  
384 dual-indexing approach for multiplexed 16S rRNA gene sequencing on the Illumina  
385 MiSeq platform. *Microbiome*. 2014;2:6.
- 386 27. Lozupone C, Knight R. UniFrac: a New Phylogenetic Method for Comparing Microbial  
387 Communities. *Appl. Environ. Microbiol. American Society for Microbiology*;  
388 2005;71:8228–35.
- 389 28. Sakowski EG, Munsell E V., Hyatt M, Kress W, Williamson SJ, Nasko DJ, et al.  
390 Ribonucleotide reductases reveal novel viral diversity and predict biological and  
391 ecological features of unknown marine viruses. *Proc. Natl. Acad. Sci. National Academy*

- 392 of Sciences; 2014;111:15786–91.
- 393 29. McAllister SM, Davis RE, McBeth JM, Tebo BM, Emerson D, Moyer CL. Biodiversity  
394 and emerging biogeography of the neutrophilic iron-oxidizing Zetaproteobacteria. *Appl.*  
395 *Environ. Microbiol.* American Society for Microbiology (ASM); 2011;77:5445–57.
- 396 30. Biodocker. <http://biodocker.org/>. Accessed 2016 Jul 21.
- 397 31. Merkel D. Docker: lightweight Linux containers for consistent development and  
398 deployment. *Linux J.* Belltown Media; 2014;2014:2.
- 399 32. GNU Operating System. <http://www.gnu.org/licenses/>. Accessed 2016 Jul 21.
- 400

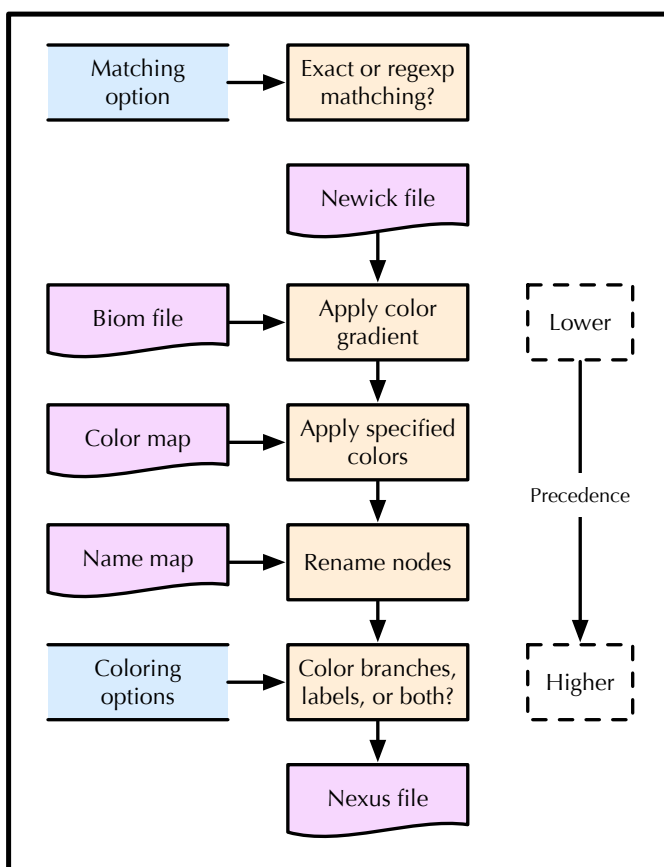

401

402 **Fig. 1: Precedence of Iroki's customization pipeline**

403 Flowchart illustrating the precedence of steps when performing multiple customizations  
404 with Iroki. Input/output files are purple, command line options are in blue, and processes  
405 are orange. The choice of exact or regular expression matching guides each subsequent  
406 step of the process. Iroki gives higher precedence to processes towards the bottom of the  
407 diagram. For example, given that a user selects the options for coloring both labels and  
408 branches, and provides both a biom file and color map with the color map specifying  
409 colors for the labels only, then the branches will be colored according to the color  
410 gradient inferred from the biom file, whereas the labels will be colored according to the  
411 rules specified in the color map.

412

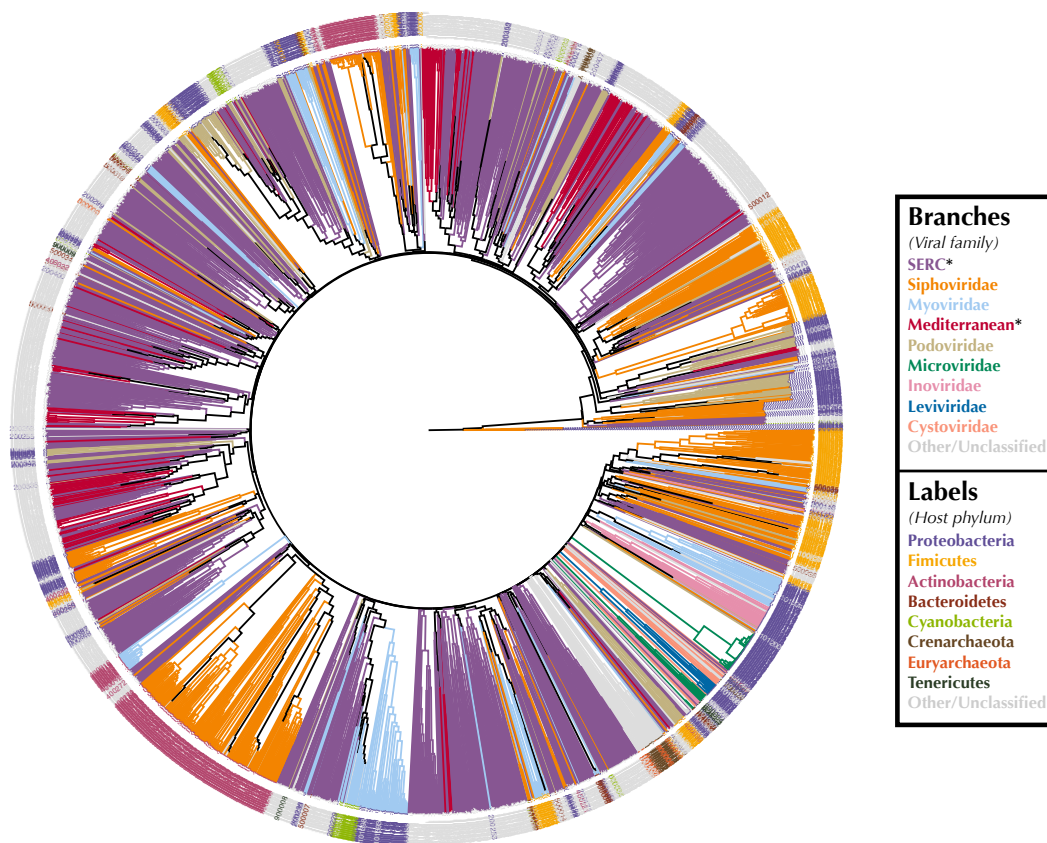

413

0.9

414 **Fig. 2: Comparing phage and their host phyla**

415 All phage genomes from Phage SEED with assembled virome contigs from the Chesapeake  
416 Bay and Mediterranean Sea. Iroki highlights phylogenetic trends after coloring branches  
417 according to viral family or sampling location in the case of virome contigs (marked with  
418 an asterisk in the legend), and coloring node labels according to host phylum of the  
419 phage.

420

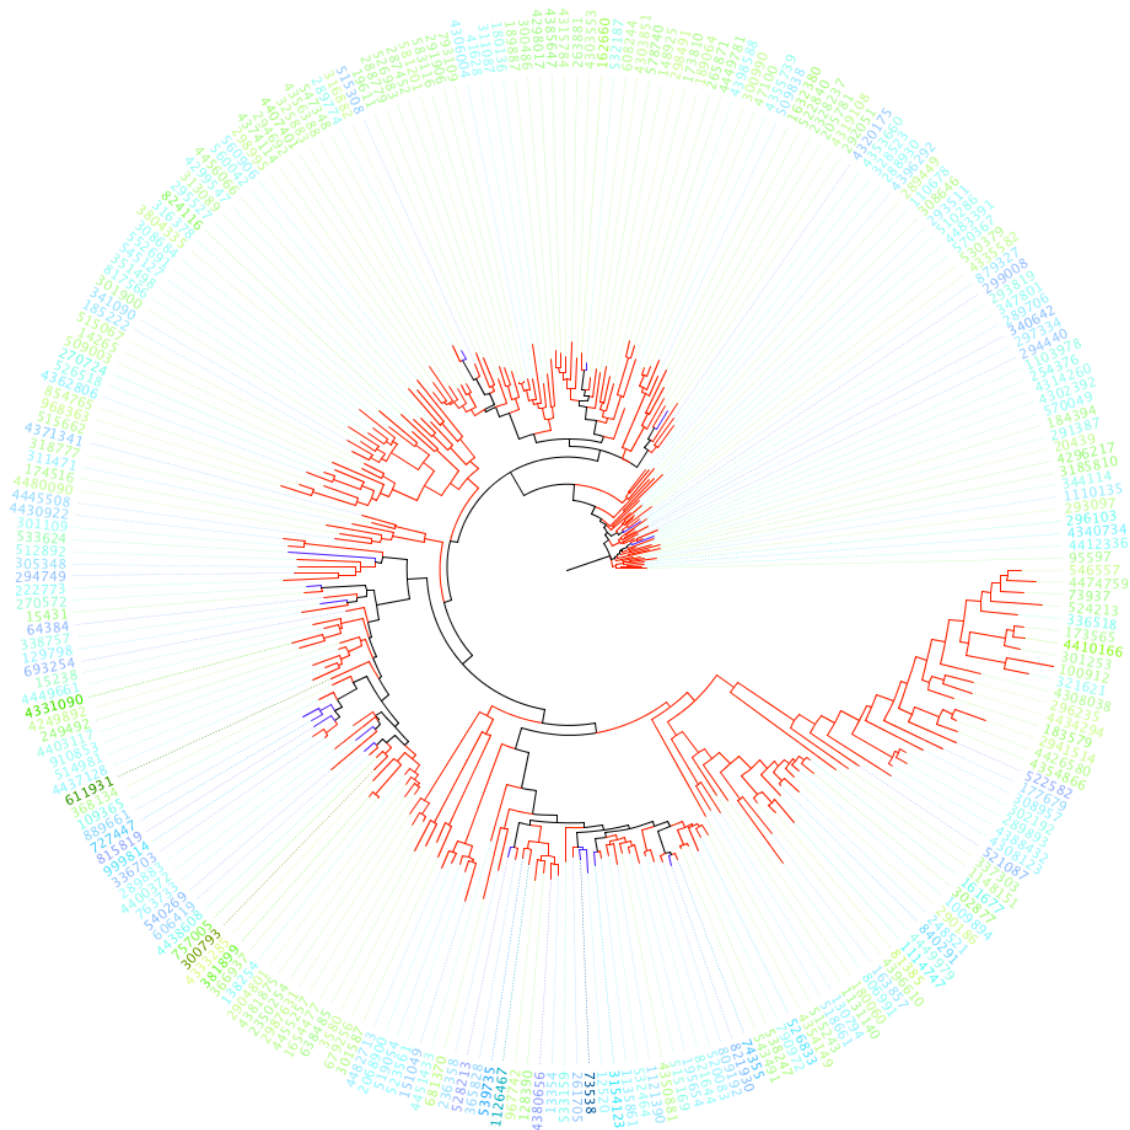

421  
422 **Fig. 3: Changes in OTU abundance in two sample groups**  
423 Approximate-maximum likelihood tree of OTUs that showed significant differences in  
424 relative abundance between STEC positive and STEC negative cattle hide samples.  
425 Branches show significance based on coloring by the p-value of a Mann-Whitney U test  
426 examining changes in abundance between samples positive for STEC ( $p < 0.05$  – red) and  
427 samples negative for STEC, ( $p \geq 0.05$  – blue). Label color on a blue-green gradient

428 highlights OTU occurrence based on the abundance ratio between STEC positive samples  
429 (blue) and STEC negative samples (green). For example, labels that are darker green had a  
430 higher abundance in STEC negative samples. Node luminosity represents overall  
431 abundance with lighter nodes being less abundant than darker nodes.



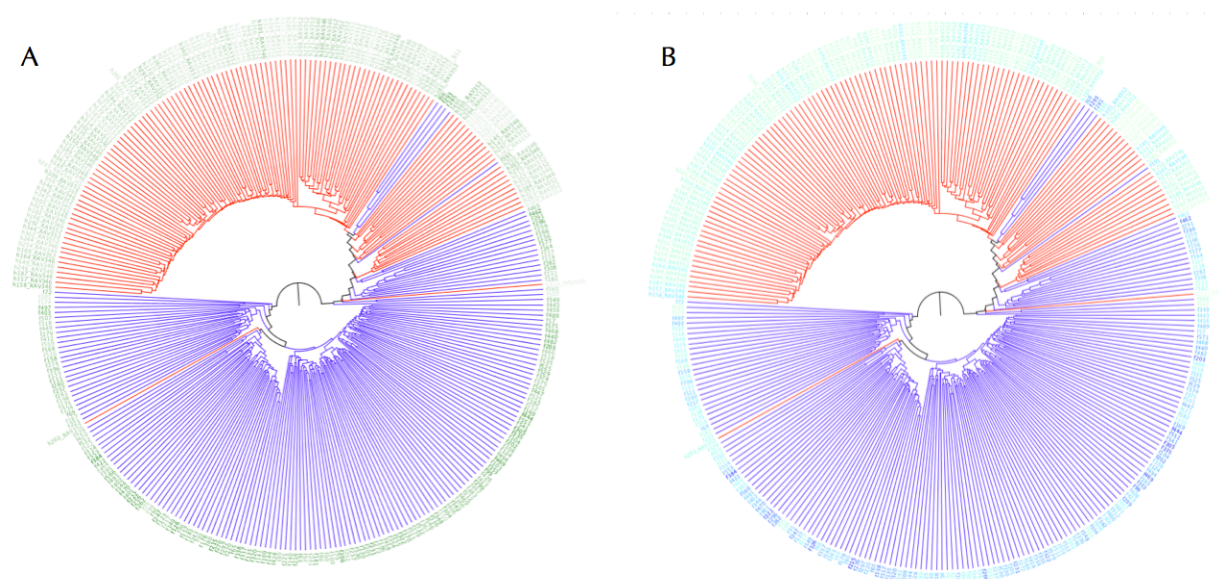

432

433 **Fig. 4: Comparing cattle fecal and hide samples and the abundance of Ruminococcaceae**

434 Phylogeny based on UPGMA tree of pairwise unweighted UniFrac distance between 356

435 bacterial community profiles based on SSU rRNA amplicon sequences from cattle hide

436 and feces. Branches are colored by feces (blue) and hide (red). Rapid testing of the

437 hypothesis that the abundance of one of the most abundant families, Ruminococcaceae,

438 and sample origin are correlated is enabled through node label coloring by (A) a green

439 single-color gradient (color saturation increases with increasing abundance of

440 Ruminococcaceae OTUs) and (B) a light green (low abundance of Ruminococcaceae

441 OTUs) to dark blue (high abundance of Ruminococcaceae OTUs) color gradient.

442

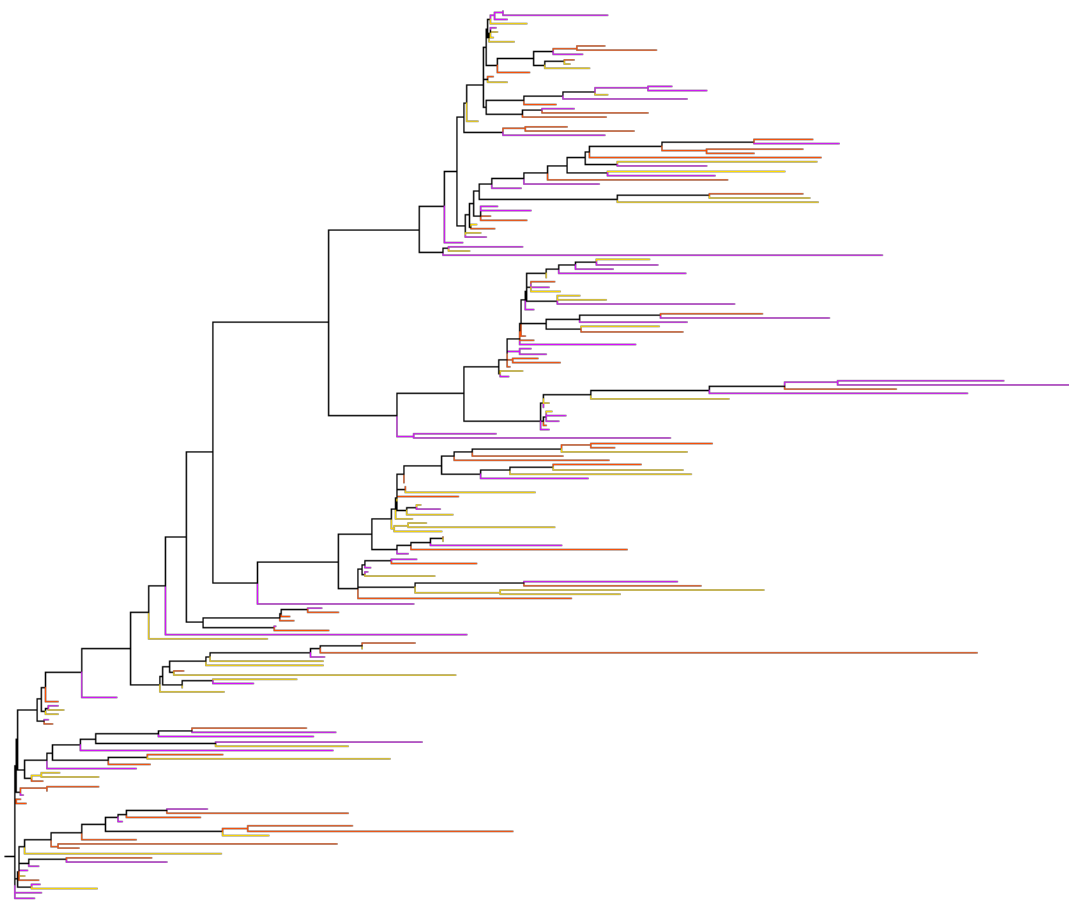

443

444 **Fig. 5: Temporal dynamics of virioplankton populations according to Cyano II RNR**

445 **amplicon phylogeny**

446 An approximately-maximum-likelihood phylogenetic tree of 200 randomly selected class

447 II Cyano RNR representative sequences from 98% percent clusters. Iroki was used to color

448 branches by time point: zero hours – yellow, six hours – orange, and twelve hours –

449 purple.

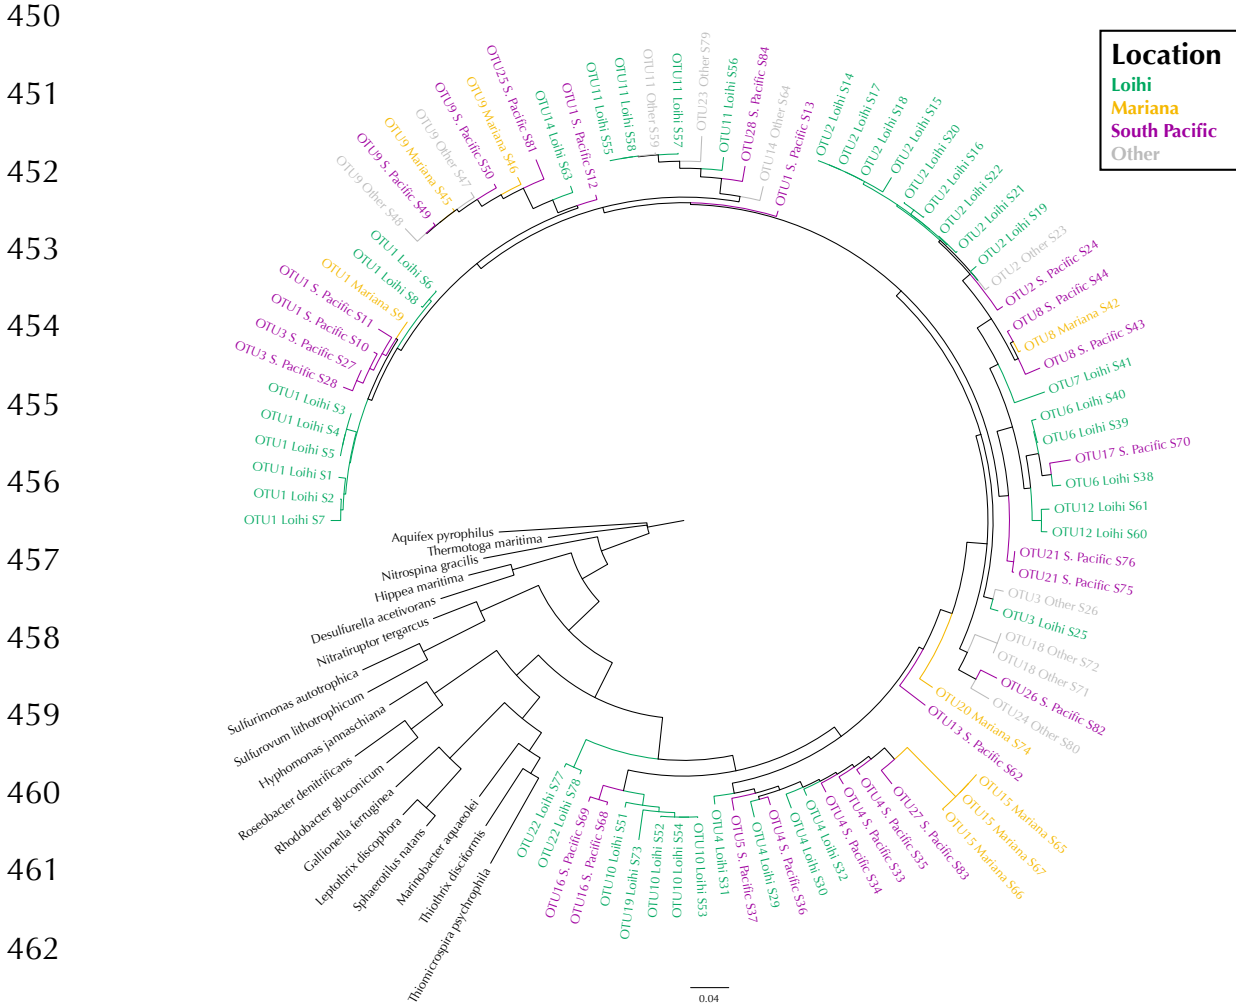

**Fig. 6: Zetaproteobacteria show biogeographic partitioning**

Phylogenetic tree showing placement of full-length Zetaproteobacteria SSU rRNA sequences with outgroups. Iroki was used to color labels and branches by geographic location of the sampling site (Loihi – green, Mariana – gold, South Pacific – purple, and Other – gray), as well as to rename the nodes with OTU and sampling site metadata.
